# Supplementary material for: Hepcidin as a therapeutic tool to limit iron overload and improve anemia in β-thalassemic mice
Source: JCI journal article supplement (doi:10.1172/jci41717), 2010-11-22
Supplement: sd1 [file 1]

## Supplemental Figure Legends.

**Supplemental Figure 1.** Hematological and iron-related parameters in groups of wt and *th3/+* mice generated by breeding and fed diets with 35 and 2.5 ppm iron for 1 and 5 months. Complete blood counts show **(A)** the Hb, RBC, and reticulocytes values, and **(B)** the MCH, MCV, and MCHC values. **(C)** The total iron content of the liver and spleen, as measured by atomic absorption. Error bars represent SD. The P values (\*P<.05, \*\*P<.01, and \*\*\*P<.001) were calculated using Student's t-test. Groups of mice on the 2.5-ppm diet were compared with the corresponding groups on the 35-ppm diet fed for the same length of time. In (C) the P values relative to comparisons between spleens are above the columns, while those between the livers are below the X-axis. The P values in the small rectangles above the columns refer to the total iron content of liver and spleen.

**Supplemental Figure 2.** Epo levels measured in mice fed defined iron diets and mice over-expressing *Hamp1*. **(A)** Wt and *th3/+* mice on the 35-ppm and 2.5-ppm iron diets. (\*P<.05). **(B)** Tg-*Hamp* and Tg-*Hamp/th3* mice, and the corresponding controls, Tg(-) and Tg(-)/*th3* mice, on a 35-ppm diet after 1 and 5 months, respectively. HHE mice showed Epo levels of 3800 (HHE-1), 13700 (HHE-2), and 13300 (HHE-3) pg/mL.

**Supplemental Figure 3.** The total iron content of the kidneys (top) and heart (bottom) of **(A, B)** mice on the 35-ppm and 2.5-ppm iron diets, and **(C, D)** mice over-expressing *Hamp1* as measured by atomic absorption. (P values \*P<.05, \*\*P<.01, and \*\*\*P<.001).

**Supplemental Figure 4.** Effects of dietary iron and over-expression of *Hamp1* on the size of the liver (normalized to body weight). **(A)** Wt and *th3/+* mice fed the 35- and 2.5-ppm iron diets for 1 and 5 months. **(B)** *Tg-Hamp*, *Tg-Hamp/th3*, and relative control mice fed the 35-ppm iron diet for 1 and 5 months. Body weights are shown in **(C)** for wt and *th3/+* mice fed the 35- and 2.5-ppm iron diets, and in **(D)** for *Tg-Hamp*, *Tg-Hamp/th3* and control mice. (\*\*P<.01).

**Supplemental Figure 5.** **(A)** Spleen and **(B)** liver sections stained with Prussian blue to detect iron (in blue) (magnification 100X). The red arrows indicate areas of co-localization of iron and EMH in the liver.

**Supplemental Figure 6.** **(A)** Spleen cells from *Tg(-)/th3*, *th3/+* on the 2.5-ppm iron diet, and *Tg-Hamp/th3* mice were stained with the CD44 and Ter119 markers, and analyzed by flow cytometry to identify the CD44+/Ter119+ and CD44-/Ter119+ populations. **(B)** The aforementioned populations were subsequently plotted according to forward side scatter on the X-axis and CD44 expression on the Y-axis, so as to identify 5 different stages of erythroid differentiation, corresponding to proerythroblasts (fraction I), basophilic (II), polychromatic (III), orthochromatic cells and reticulocytes (IV), and mature RBC (V). **(C)** The total number of cells in each fraction. Both *th3/+* mice on the 2.5-ppm iron diet and *Tg-Hamp/th3* mice showed a reduction in the number of immature populations (I-IV), and a trend toward an increase in mature RBC (V).

**Supplemental Figure 7.** The architecture of the spleen is more normal and EMH is reduced in the liver of Tg-*Hamp/th3* mice maintained on a diet containing 35-ppm iron. (A) Spleen and (B) liver staining with hematoxylin & eosin (H&E) (magnification 40X and 400X respectively). The red arrows indicate the presence of erythroid cells in the liver (EMH).

**Supplemental Figure 8.** High performance liquid chromatography (HPLC) analysis of RBC membrane-associated globins from two representative mice (A) Tg(-)/*th3* and (B) Tg-*Hamp/th3*. The percentages of the area under each peak are indicated. All the Tg-*Hamp/th3* mice analyzed showed a remarkable reduction of membrane-associated alpha-chains compared to Tg(-)/*th3* control mice. The relative amounts of alpha- and beta-globin chains in the RBCs were also evaluated by HPLC. The same number of RBCs from each mouse was processed and run on a Vydac C4 column (4.6 x 250 mm, 5 mm, 300 Å, no. 214TP54) (Grace Vydac, Deerfield, IL), as described by Han et al. (1).

**Supplemental Figure 9.** Effects of over-expression of *Hamp1* on *Fpn1* levels in the duodenum of Tg-*Hamp*, Tg-*Hamp/th3* and relevant control mice after 1 and 5 months on the 35-ppm iron diet.

## References

1. Han, A.P., Yu, C., Lu, L., Fujiwara, Y., Browne, C., Chin, G., Fleming, M., Leboulch, P., Orkin, S.H., and Chen, J.J. 2001. Heme-regulated eIF2alpha kinase (HRI) is required for translational regulation and survival of erythroid precursors in iron deficiency. *EMBO J* 20:6909-6918.

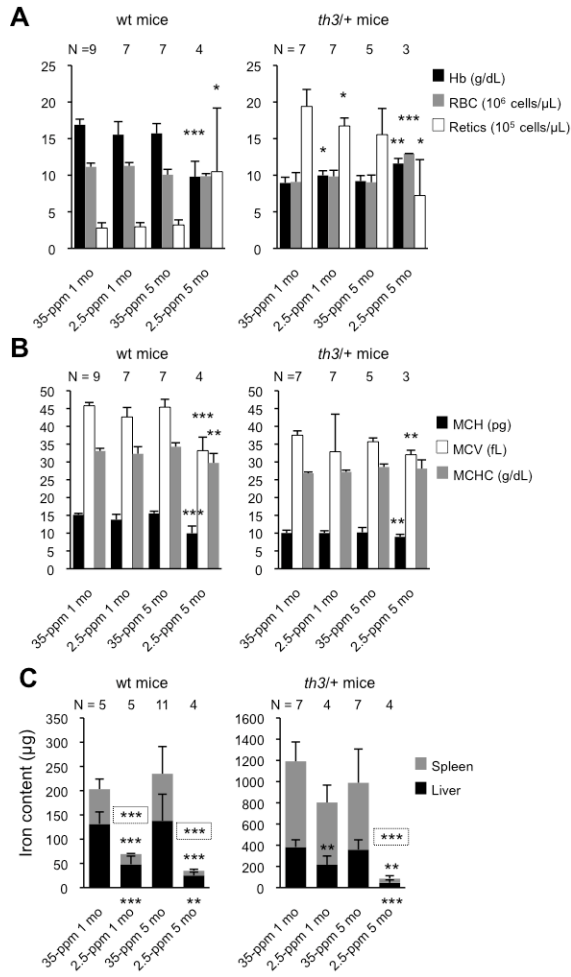

**Supplemental Figure 1**

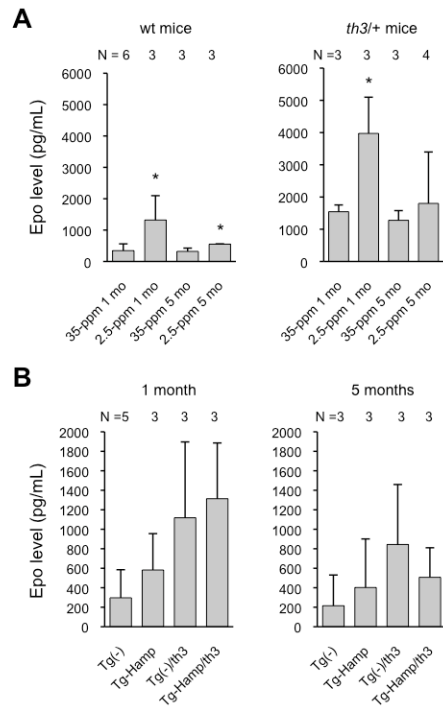

**Supplemental Figure 2**

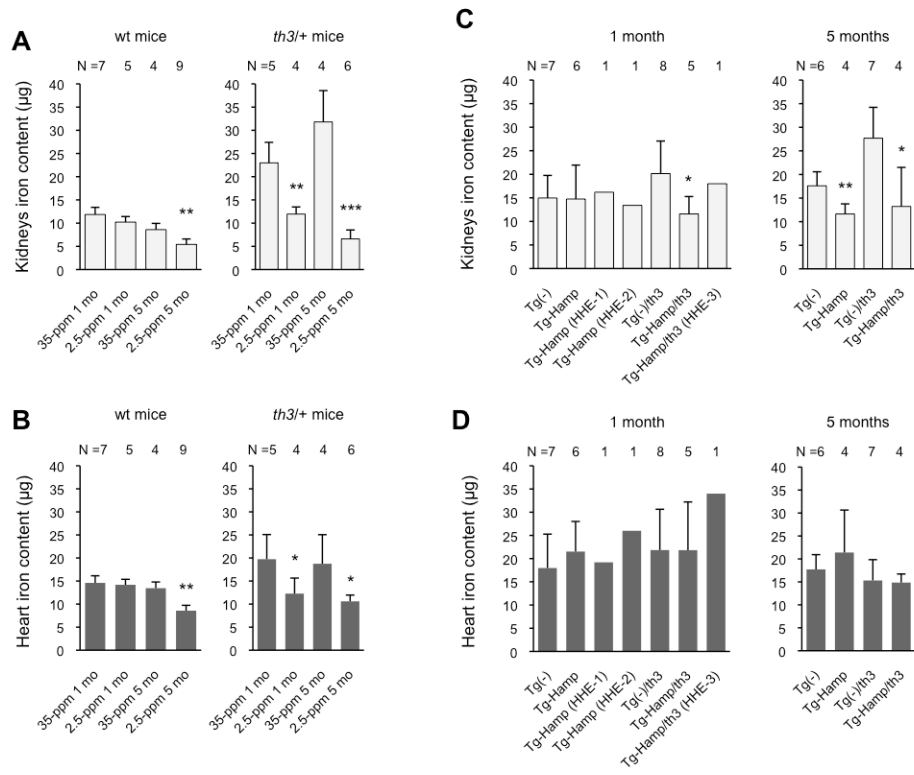

Supplemental Figure 3

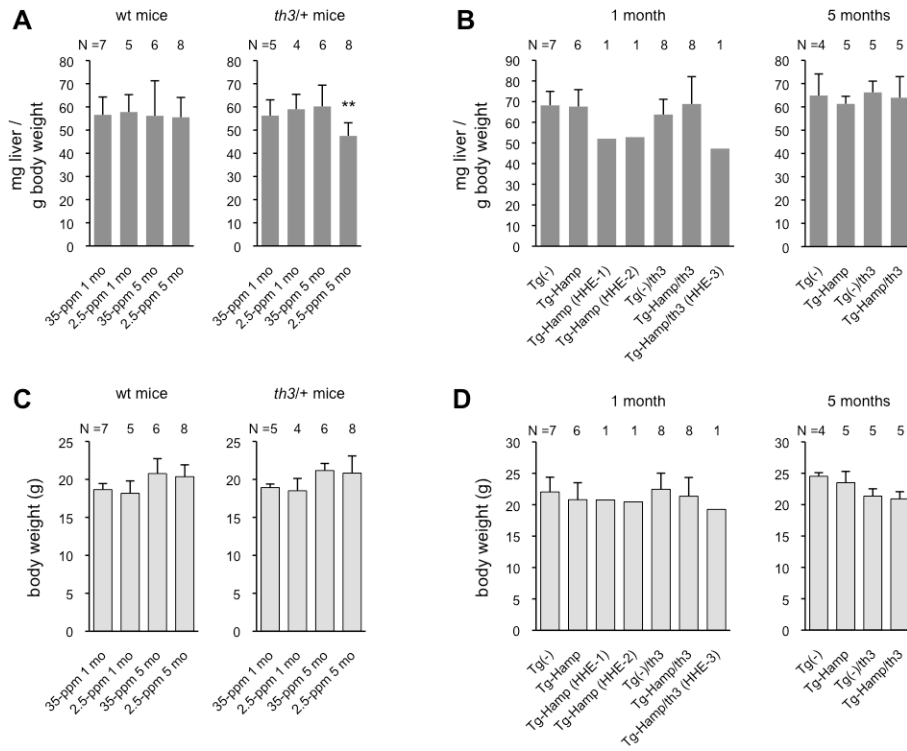

Supplemental Figure 4



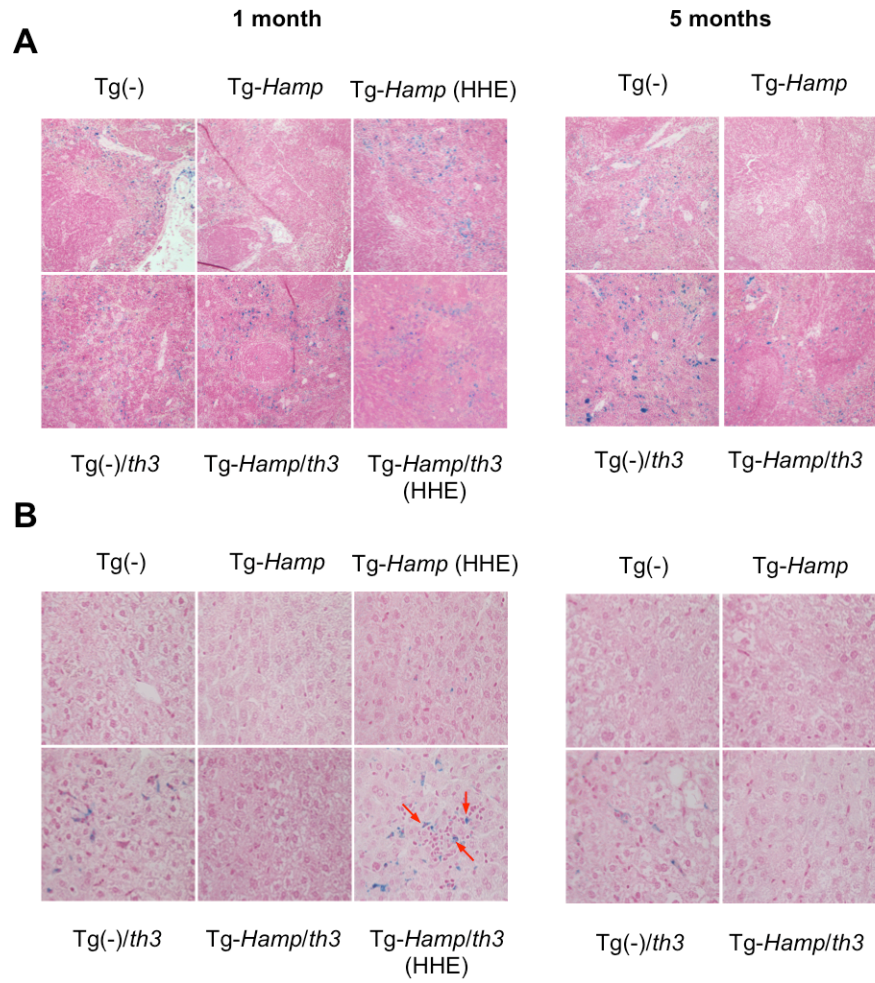

**Supplemental Figure 5**

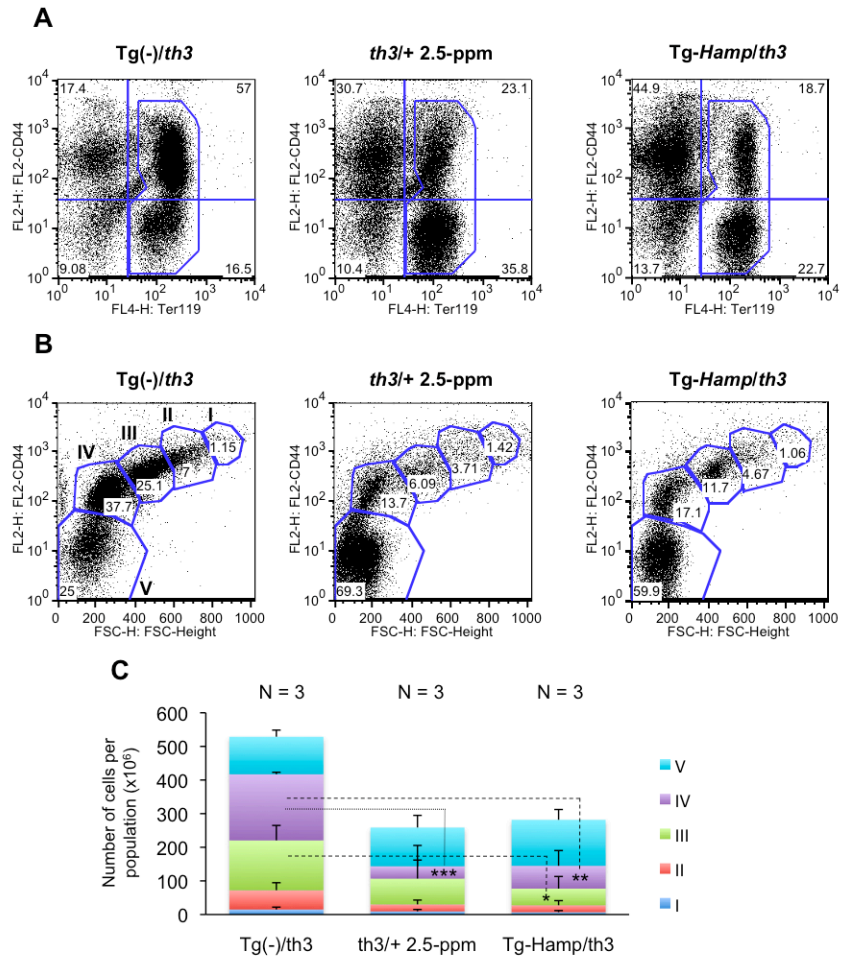

**Supplemental Figure 6**

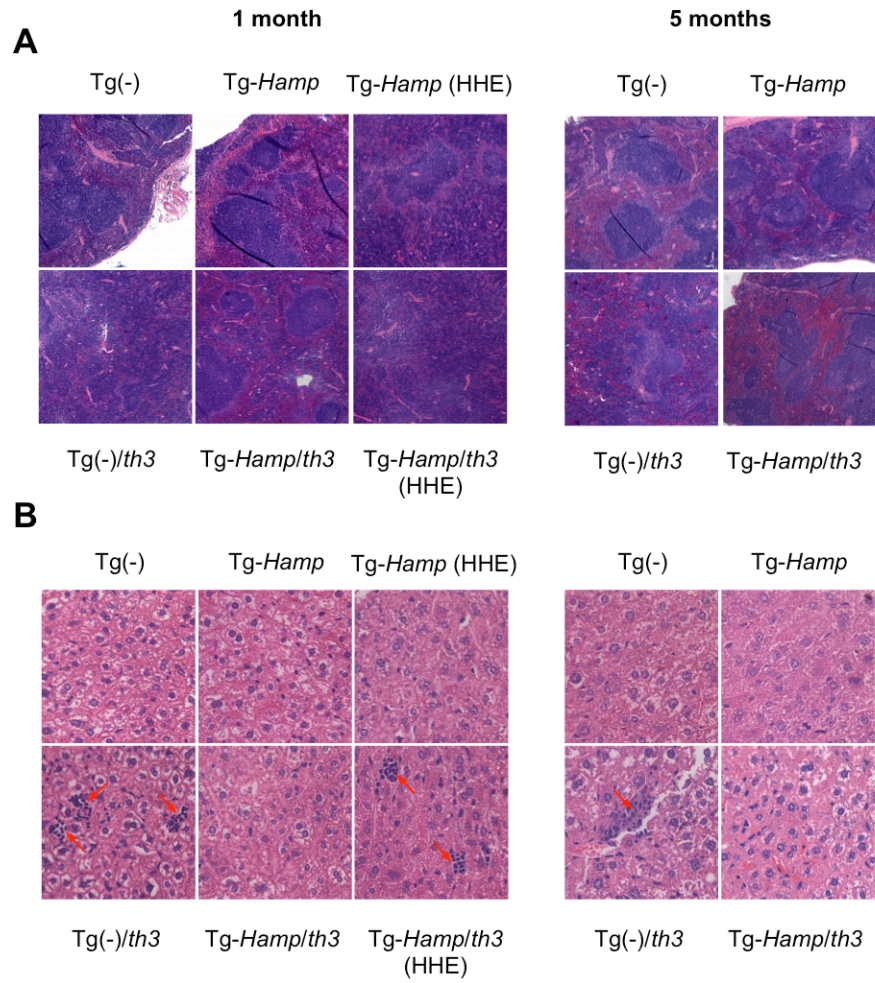

**Supplemental Figure 7**

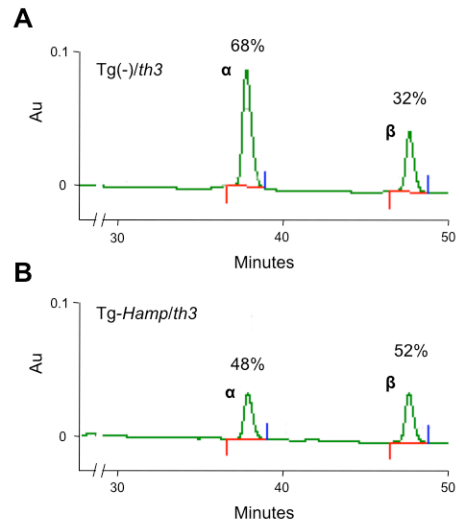

**Supplemental Figure 8**

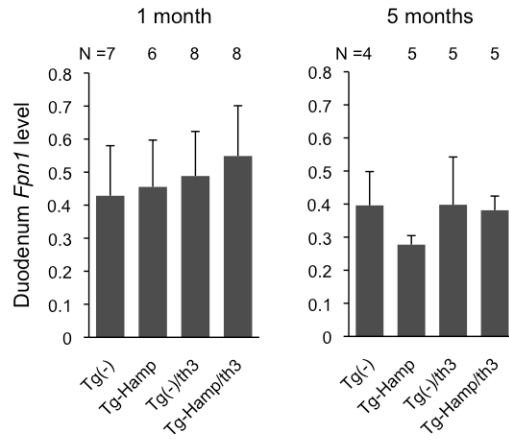

**Supplemental Figure 9**
